# Supplementary material for: Poly(glycidyl methacrylate)-functionalized magnetic nanoparticles as platforms for linking functionalities, bioentities and organocatalysts
Source: Royal Society of Chemistry journal article supplement (doi:10.1039/c6ra05126j), 2016-01-01
Supplement: c6ra05126j1.pdf [file c6ra05126j1.pdf]

Electronic Supplementary Information

Poly glycidyl methacrylate – functionalized magnetic nanoparticles as platforms for linking functionalities, bioentities and organocatalysts

Alexandrina Nan\*, Teodora Radu, Rodica Turcu

National Institute of R&D for Isotopic and Molecular Technologies, Donat Str. 67-103, 400293 Cluj-Napoca, Romania

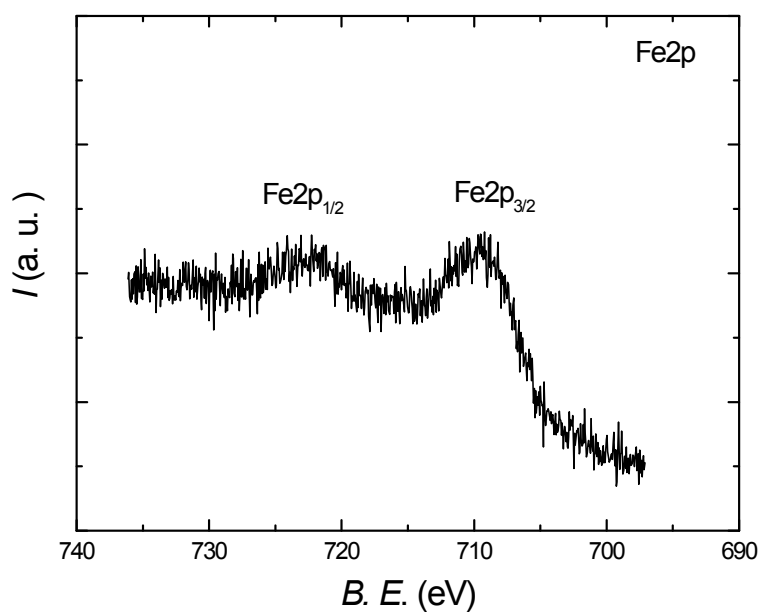

**Fig. S1.** High resolution XPS Fe2p spectra of pGMA coated MNPs 5.

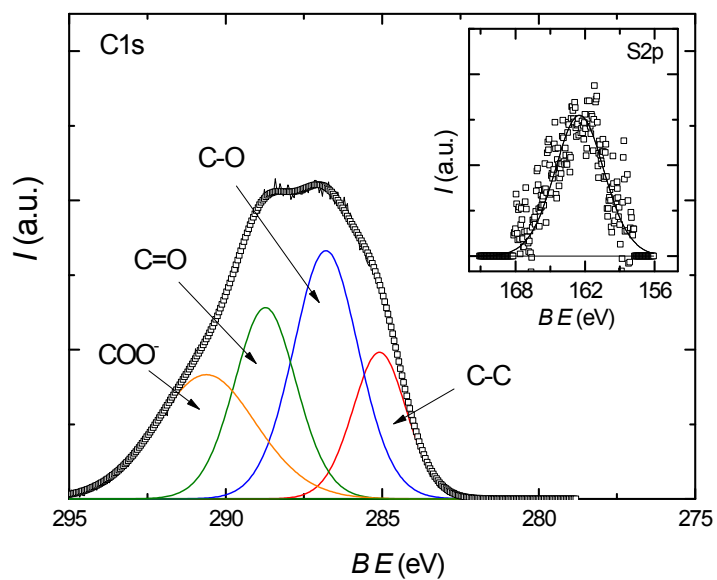

**Fig. S2.** High resolution XPS C1s spectrum of **10b**. Inset: XPS S2p spectrum.

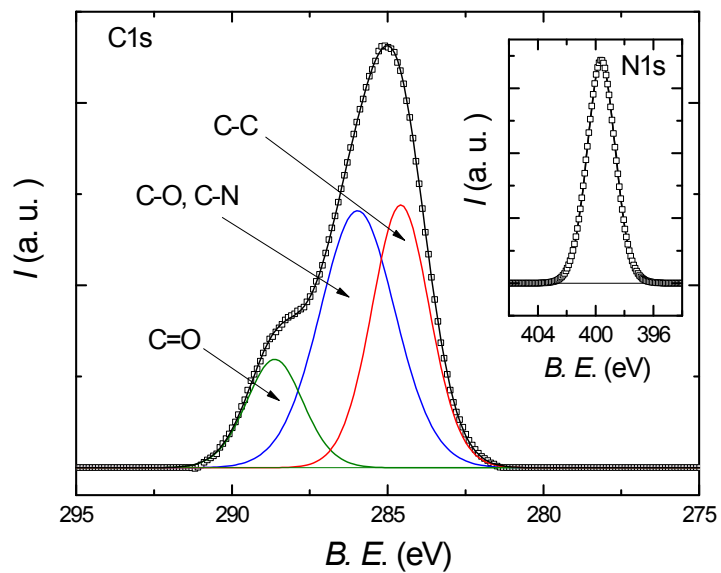

**Figure S3.** High resolution C1s XPS spectrum of proline functionalized MNPs **13**. Inset: XPS N1s spectrum.

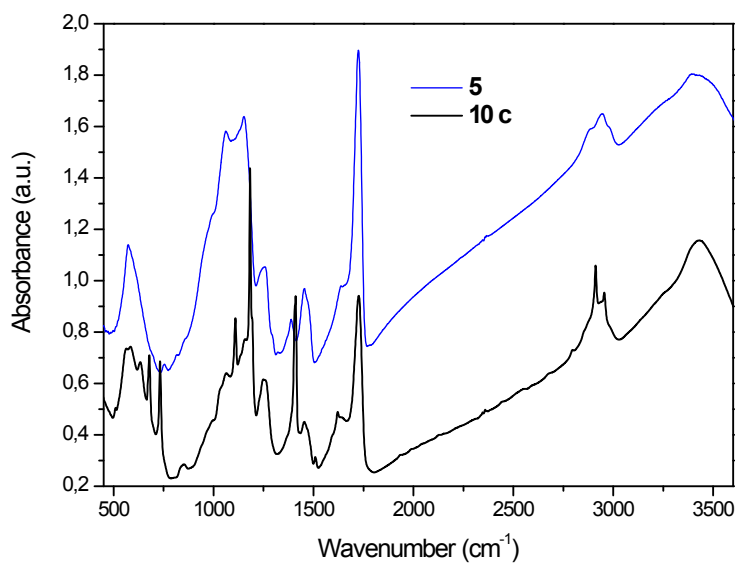

**Fig. S4.** FTIR spectrum of the MNP **5** and **10c**

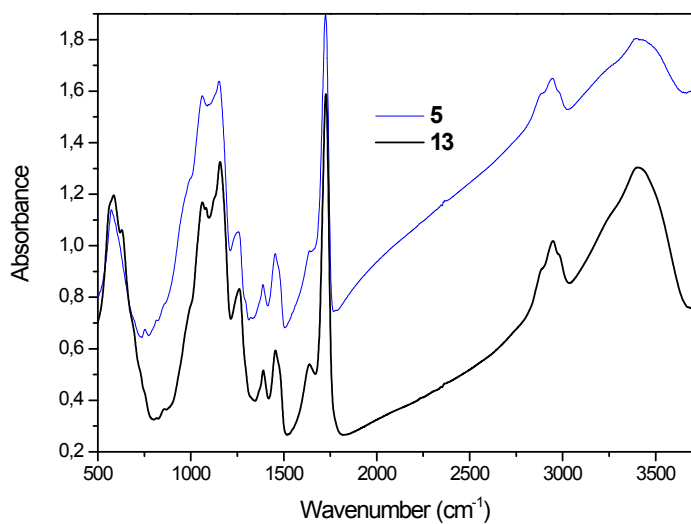

**Fig. S5.** FTIR spectrum of the MNP **5** and **13**
